# Supplementary material
Source: PubMed Central journal article supplement (PMC3328647)
Supplement: NIHMS350205-supplement-06.pdf [file NIHMS350205-supplement-06.pdf]

**Supplementary Table 1**      **Characteristics of patients with HCC**

| # | Age | Gender | Histology<br>Tumor* | Maximum<br>Tumor Size (cm) | Hepatic<br>Tumor | AFP level**<br>(ng/ml) | Risk factor  |
|---|-----|--------|---------------------|----------------------------|------------------|------------------------|--------------|
| 1 | 60  | Male   | W                   | 15.0                       | Multiple         | 14.5                   | None         |
| 2 | 67  | Male   | W                   | 4.2                        | Solitary         | 3.2                    | HCV, Alcohol |
| 3 | 59  | Male   | W                   | 4.4                        | Multiple         | 181.7                  | HCV, Alcohol |
| 4 | 76  | Male   | W                   | 5.0                        | Solitary         | 5.8                    | None         |
| 5 | 55  | Male   | ND                  | 3.1                        | Solitary         | 14.7                   | HCV, Alcohol |

\*W, well differentiated; ND, not determined; HCV, hepatitis C virus.

\*\*Normal level <10 ng/ml
