# Supplementary material
Source: PubMed Central journal article supplement (PMC3328647)

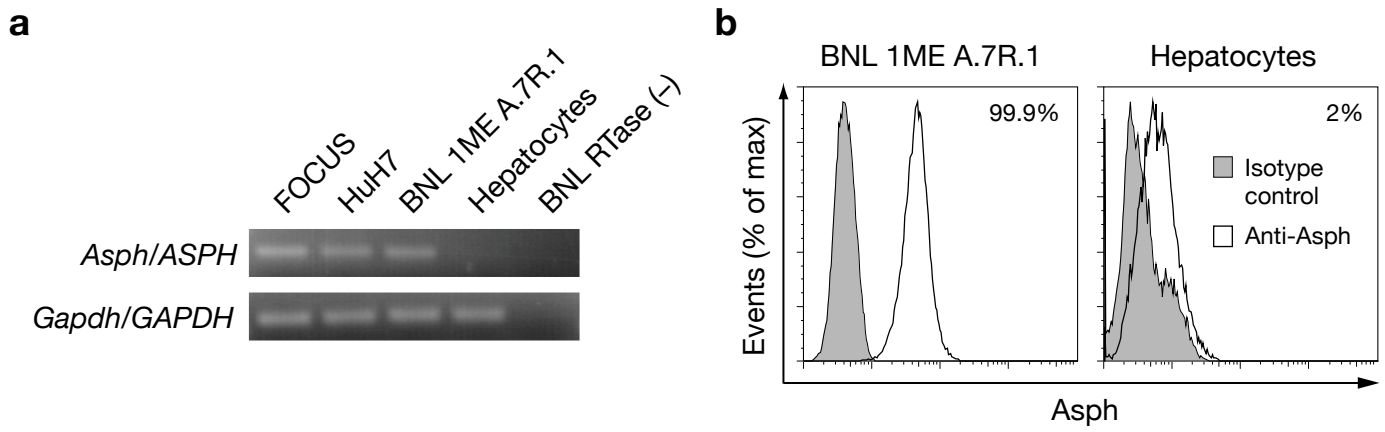

**Supplementary figure 1**

Supplement: NIHMS350205-supplement-02.pdf [file NIHMS350205-supplement-02.pdf]

**a**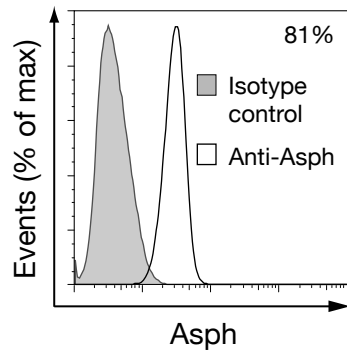**b**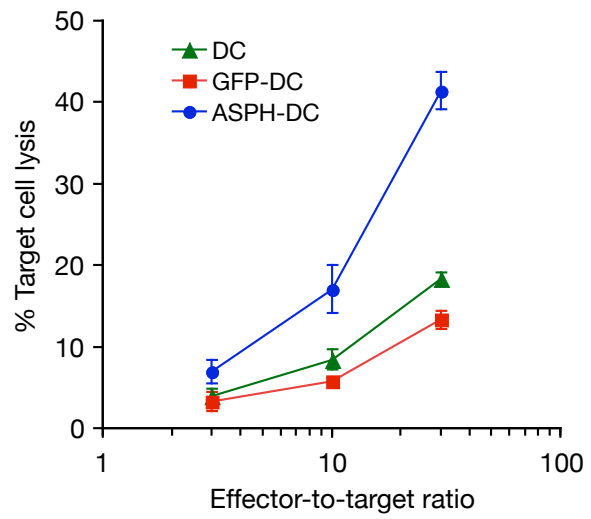**Supplementary figure 2**

Supplement: NIHMS350205-supplement-03.pdf [file NIHMS350205-supplement-03.pdf]

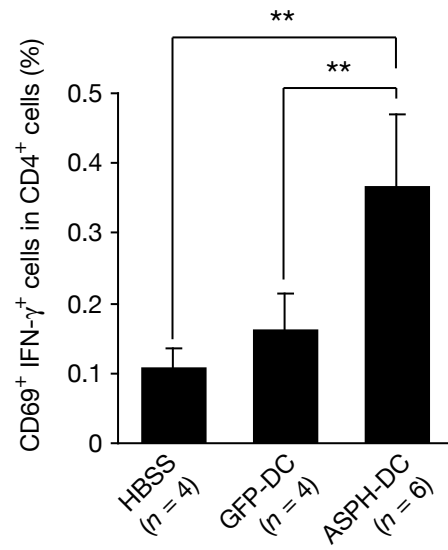

**Supplementary figure 3**

Supplement: NIHMS350205-supplement-04.pdf [file NIHMS350205-supplement-04.pdf]

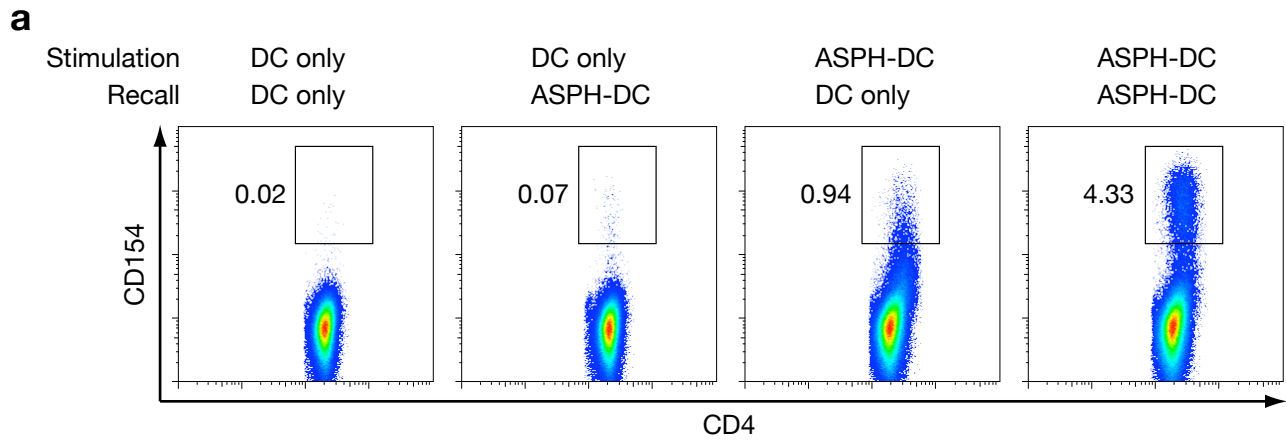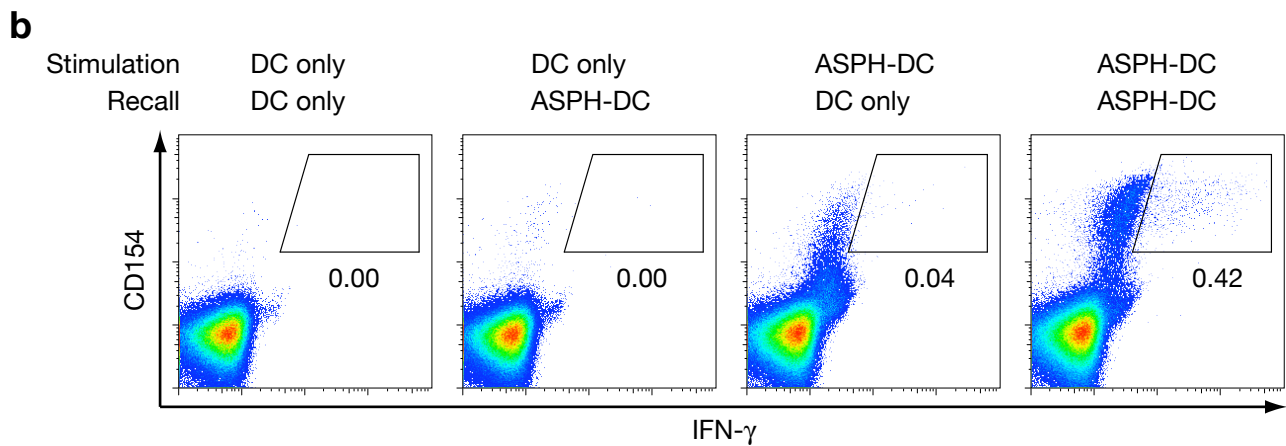

**Supplementary figure 4**

Supplement: NIHMS350205-supplement-05.pdf [file NIHMS350205-supplement-05.pdf]
